# Supplementary material for: The Two-Track Investigation of Fibronectin Binding Protein A of Staphylococcus aureus from Bovine Mastitis as a Potential Candidate for Immunodiagnosis: A Pilot Study
Source: MDPI journal article supplement (doi:10.3390/ijms24076569), 2023-03-31
Supplement: s1 [file s1]

List of reference sequences representing several species of bacteria, viruses, and fungi that can be found in cow milk

| No. | Species                          |
|-----|----------------------------------|
| 1   | <i>Mycoplasma agalactiae</i>     |
| 2   | <i>Mycoplasma alkalescens</i>    |
| 3   | <i>Mycoplasma canadense</i>      |
| 4   | <i>Mycoplasma bovigenitalium</i> |
| 5   | <i>Acholeplasma brassicae</i>    |
| 6   | <i>Acholeplasma oculi</i>        |
| 7   | <i>Acholeplasma palmae</i>       |
| 8   | <i>Acholeplasma laidlawii</i>    |
| 9   | <i>Aspergillus spp.</i>          |
| 10  | <i>Aspergillus fumigatus</i>     |
| 11  | <i>Bovine herpesvirus 4</i>      |
| 12  | <i>Candida albicans</i>          |
| 13  | <i>Candida glabrata</i>          |
| 14  | <i>Cryptococcus neoformans</i>   |
| 15  | <i>Saccharomyces spp.</i>        |
